# Supplementary material
Source: Springer Nature journal article supplement (https://www.springermedizin.de/resource/supplementary/13054_2010_8821_MOESM4_ESM.pdf/9732652)

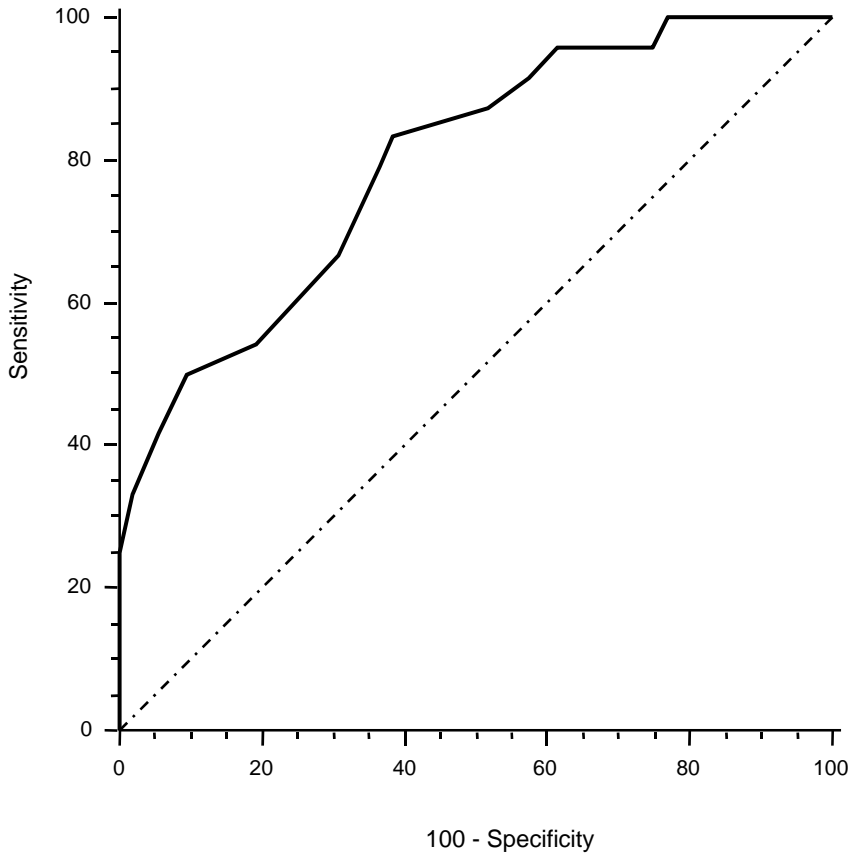

Supplement: MOESM4 [file 9732652]
